# Supplementary material for: New insights into the structure of a CeO2–ZrO2–Al2O3 composite and its influence on the performance of the supported Pd-only three-way catalyst
Source: Royal Society of Chemistry journal article supplement (doi:10.1039/c5cy00612k), 2015-01-01
Supplement: c5cy00612k1.pdf [file c5cy00612k1.pdf]

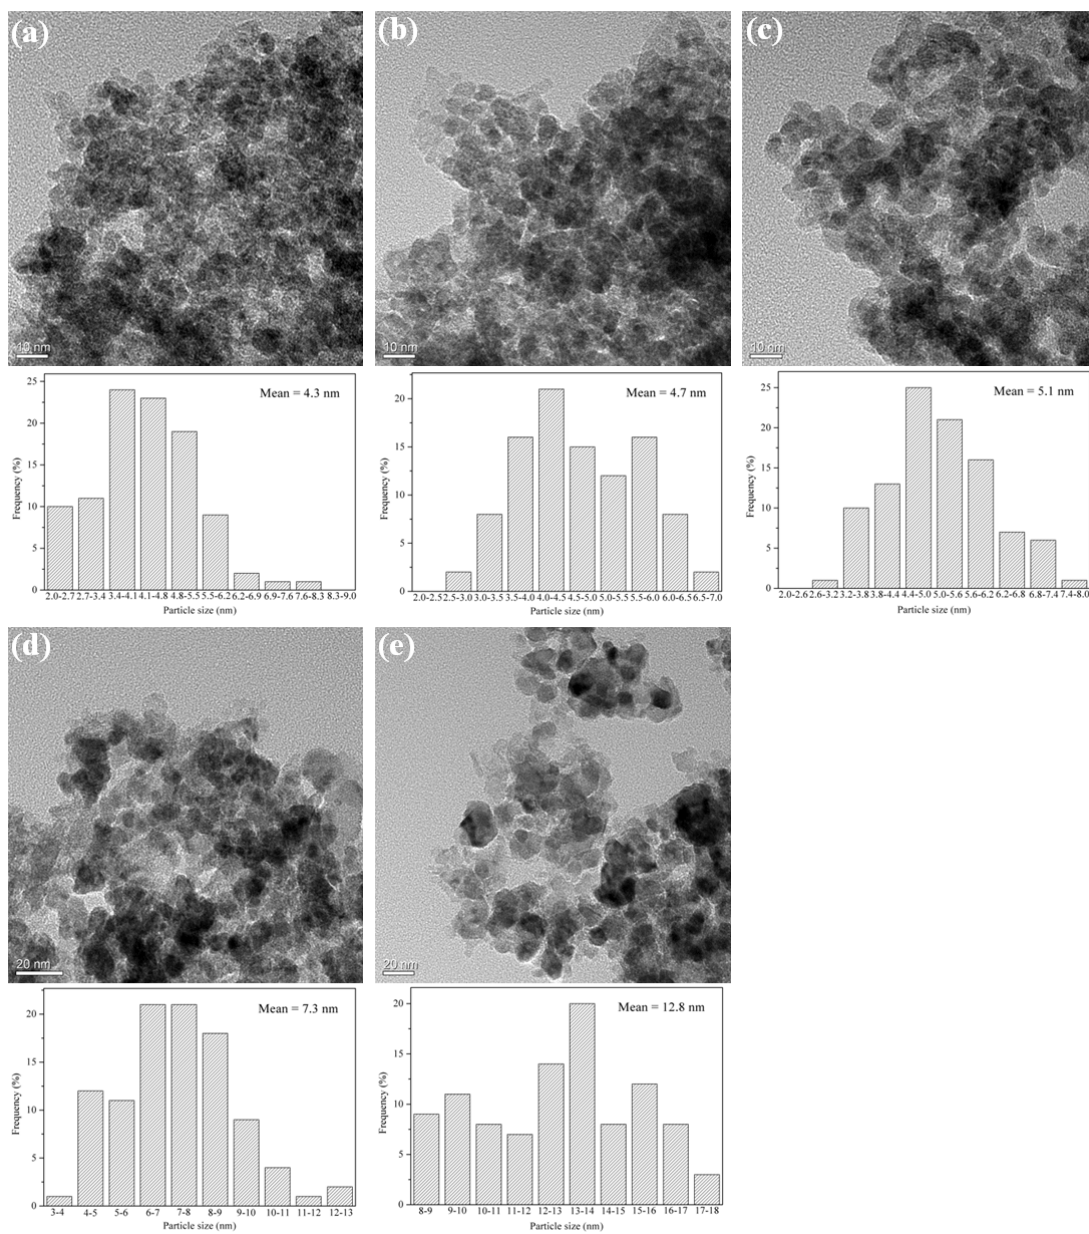

**Fig. S1** TEM images of (a) Pd/CZA600, (b) Pd/CZA700, (c) Pd/CZA800, (d) Pd/CZA900, (e) Pd/CZA1000 and the corresponding particle size distributions.
